# Supplementary material
Source: Springer Nature journal article supplement (https://www.springermedizin.de/resource/supplementary/12885_2012_3622_MOESM2_ESM.pdf/9465062)

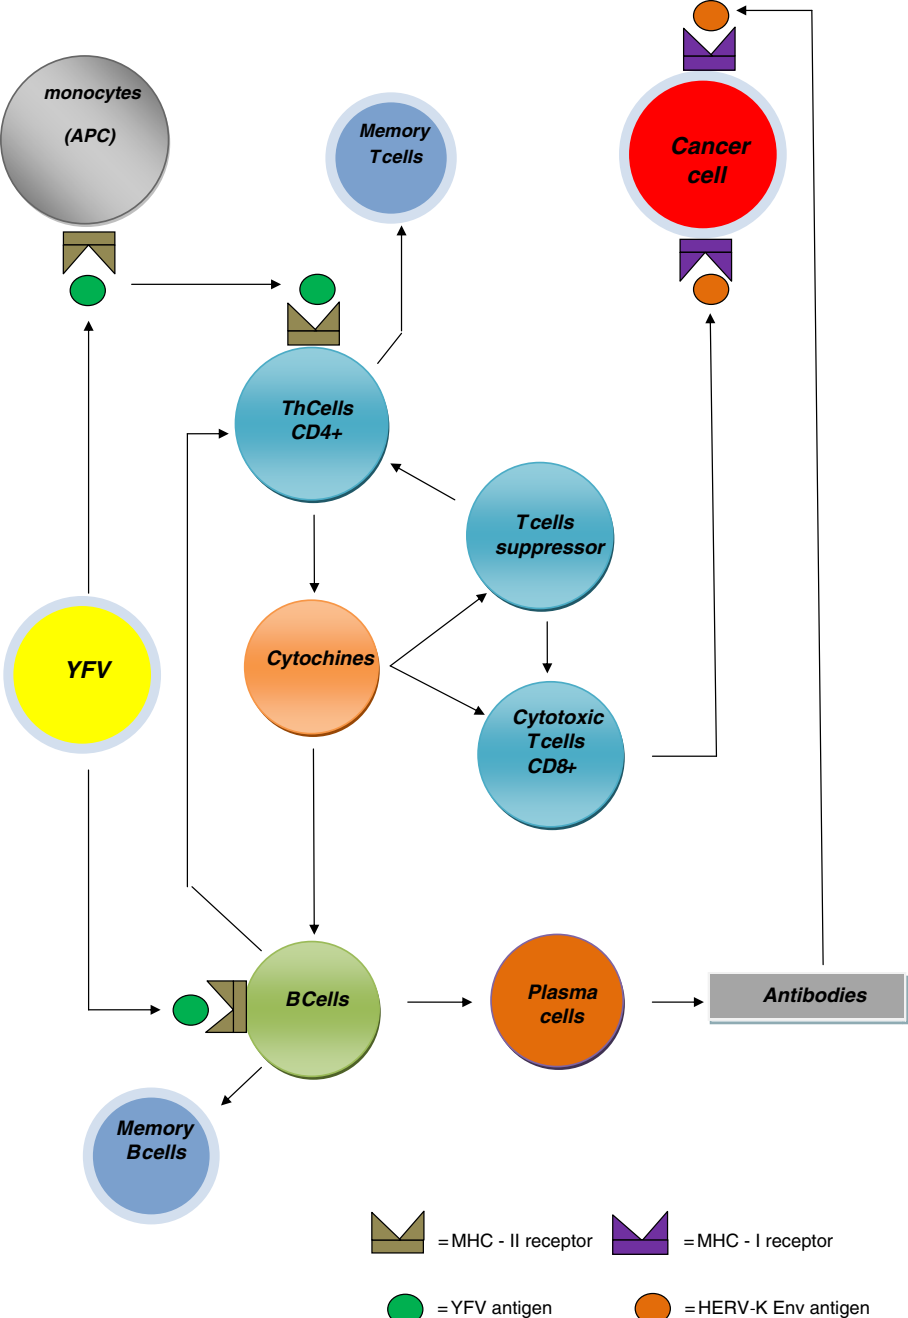

Supplement: MOESM2 [file 9465062]
